# Supplementary figures and images for: Phase I study of imalumab (BAX69), a fully human recombinant antioxidized macrophage migration inhibitory factor antibody in advanced solid tumours
Source: PubMed Central journal article supplement — Br J Clin Pharmacol. 2020 Apr 12;86(9):1836–48. doi: 10.1111/bcp.14289 (PMC7444762; doi:10.1111/bcp.14289), 2020-04-12

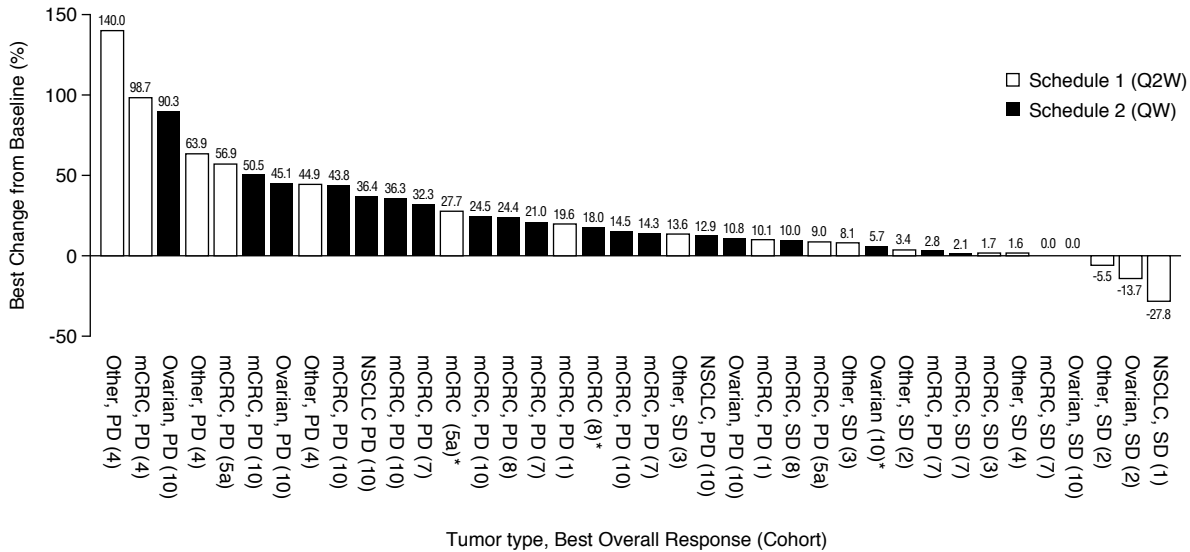

Supplement: BCP-86-1836-s004.pdf [file BCP-86-1836-s004.pdf]
